# Supplementary material
Source: publisher figshare collection journal article supplement (https://frontiersin.figshare.com/ndownloader/files/21548280)
Supplement: Supplementary file [file 21548280]

## Supplementary Material

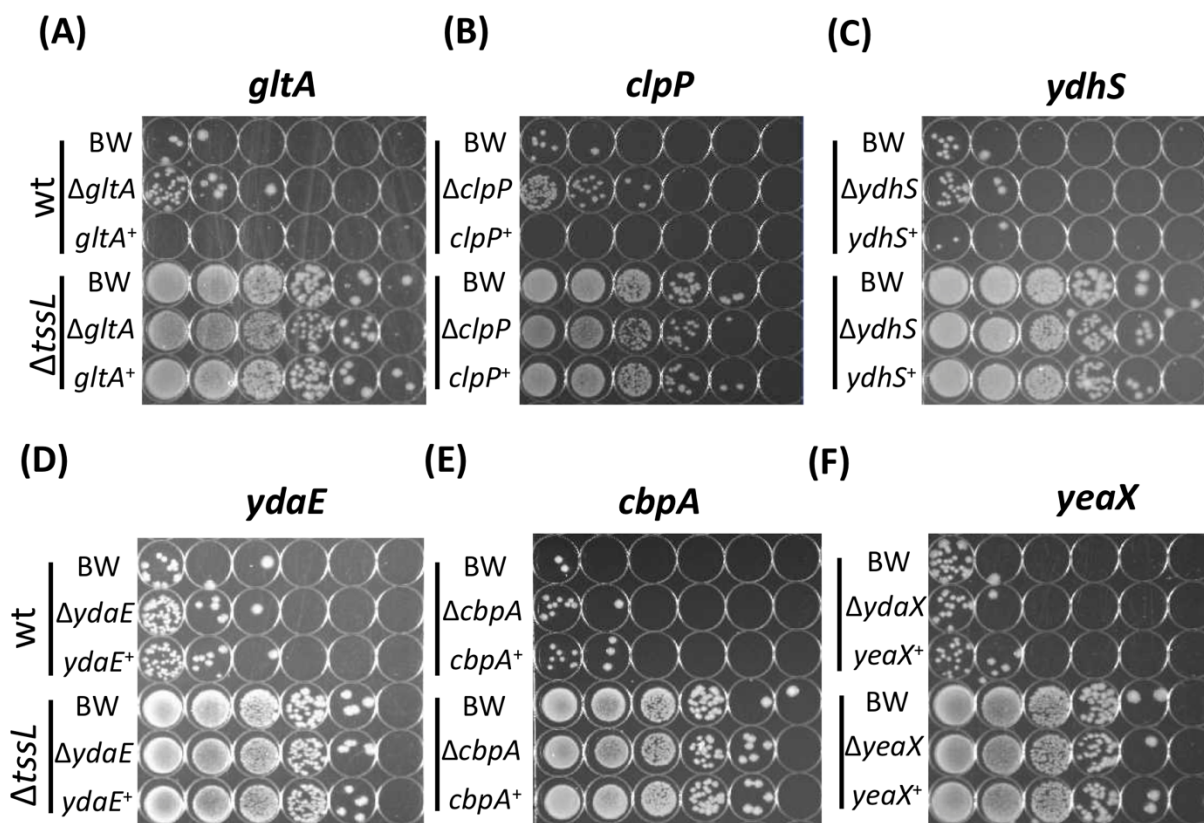

**Supplementary Figure 1. Interbacterial competition assay between *A. tumefaciens* C58 and the *E. coli* candidates that were less susceptible to T6SS killing.** The *A. tumefaciens* C58 wild-type or  $\Delta$ *tssL* were co-cultured at a ratio of 30:1 with *E. coli* BW25113 wild type (BW), the Keio mutant strains, and complemented strains expressing the mutated genes *in trans*. The Keio strain used was (A)  $\Delta$ *gltA*, (B)  $\Delta$ *clpP*, (C)  $\Delta$ *ydhS*, (D)  $\Delta$ *ydaE*, (E)  $\Delta$ *cbpA*, and (F)  $\Delta$ *yeaX*. Data shown are its representative results; at least two independent experiments were performed in each group.
